1  
2  
3  
4  
5  
6  
7  
8  
9  
10  
11  
12  
13  
14  
15  
16  
17  
18  
19  
20  
21  
22  
23  
24

## Loss of leaf-out and flowering synchrony under global warming

Authors: Constantin M. Zohner\*<sup>1</sup>, Lidong Mo<sup>1</sup> and Susanne S. Renner<sup>2</sup>

### **Affiliations:**

<sup>1</sup>Institute of Integrative Biology, ETH Zurich (Swiss Federal Institute of Technology),  
Universitätsstrasse 16, 8092 Zurich, Switzerland

<sup>2</sup>Systematic Botany and Mycology, Department of Biology, University of Munich (LMU), 80638  
Munich, Germany

\*Author for correspondence: [constantin.zohner@t-online.de](mailto:constantin.zohner@t-online.de)

**Keywords:** Climate change | Phenology | Temperate plants | Flowering | Leaf unfolding | Day-  
length | Chilling

25 **Abstract**

26 The temporal overlap of phenological stages, phenological synchrony, crucially influences  
27 ecosystem functioning. For flowering, among-individual synchrony influences gene flow. For  
28 leaf-out, it affects interactions with herbivores and competing plants. If individuals differ in their  
29 reaction to the ongoing change in global climate, this should affect population-level synchrony.  
30 Here, we use climate-manipulation experiments, Pan-European long-term (>15 years)  
31 observations, and common garden monitoring data on up to 72 woody and herbaceous species to  
32 study the effects of increasing temperatures on the extent of within-population leaf-out and  
33 flowering synchrony. Warmer temperatures reduce *in situ* leaf-out and flowering synchrony by  
34 up to 55%, and experiments on European beech provide a mechanism for how individual genetic  
35 differences may explain this finding. The rapid loss of reproductive and vegetative synchrony in  
36 European plants predicts changes in their gene flow and trophic interactions, but community-  
37 wide consequences remain largely unknown.

38

39

40

41

42

43

44

45

46

47

48

49 The structure and functioning of ecosystems crucially depends on the timing of annually repeated  
50 life stages, such as leaf-out and flowering (1–4). Anthropogenic climate warming is causing  
51 advanced leaf-out and flowering in both herbs and trees, and this is affecting growth and  
52 reproductive success (5–8). Warmer springs and summers are also causing leaf-out and flowering  
53 to spread out over longer periods because the sensitivity to winter chilling, spring warming, and  
54 day length differs among species (2,3,9–11). Such species-specific responses imply variation in  
55 heritable phenological strategies among individuals, but how current climate warming is shifting  
56 within-population phenology and possibly synchrony has not been addressed. For leaf-out, inter-  
57 individual synchrony affects interactions with foliovores and competing plants (12). For  
58 flowering, reduced inter-individual synchrony should adversely affect gene flow by reducing  
59 cross-pollination and fruit set (13). To detect such possible effects of climate warming on within-  
60 population synchrony, a range of herbs and trees, representing different leaf-out and flowering  
61 strategies, needs to be studied.

62 Here, we use a combination of climate-manipulation experiments, common garden  
63 monitoring, and long-term Central European *in situ* observations to analyze effects of warming  
64 on within-population phenological synchrony. The long-term data were obtained from the Pan  
65 European Phenology Project (<http://www.pep725.eu>, hereafter PEP). The PEP data consisted of  
66 12,536 individual time series (each minimally 15 years long), comprising the leaf-out times of  
67 nine dominant tree species and the flowering times of six tree species, four shrubs, and five herbs  
68 (see Methods and the distribution of the sites in Fig. 1a, and Figs. S1 and S2). To define  
69 populations, we divided the study area into pixels of one-degree resolution (~110 x 85 km) and  
70 then calculated leaf-out synchrony (LOS) and flowering synchrony (FLS) in a given year as the  
71 standard deviation of leaf-out or flowering date for all individuals within a pixel (note that the  
72 data were cleaned to ensure that observed individuals were the same between years; see

73 Methods). For each pixel and each phenological stage (leaf-out or flowering), we determined the  
74 pre-season as the period 60 days before the average leaf unfolding or flowering date within the  
75 respective pixel.

76 As expected, within pixels, species' mean leaf-out dates were negatively correlated with  
77 pre-season temperature (98% of observation series statistically significant at  $P < 0.05$ ), with a  
78 mean linear correlation coefficient of  $-0.76 \pm 0.03$  (mean  $\pm$  95% confidence interval), predicting  
79 an average advance of  $4.3 \pm 0.2$  days per each degree warming. Similarly, in more than 99% of  
80 pixels, the mean flowering dates were negatively correlated with the pre-season temperature (91%  
81 statistically significant at  $P < 0.05$ ), with a mean linear correlation coefficient of  $-0.75 \pm 0.10$ ,  
82 predicting an average advance of  $4.6 \pm 0.2$  days per each degree warming.

83 Surprisingly, higher pre-season temperatures had a negative effect on LOS in eight of the  
84 nine species (Figs. 1c and S1) and on FLS in 10 out of 15 species (Figs. 1d and S2). None of the  
85 species exhibited a positive effect. Across all species, pre-season temperature negatively affected  
86 LOS in 78% of analyzed pixels (15% statistically significant at  $P < 0.05$ ), i.e., the standard  
87 deviation of inter-individual leaf-out times increased by  $0.45 \pm 0.07$  (mean  $\pm$  CI) days per degree  
88 of warming, with a mean linear correlation coefficient of  $0.19 \pm 0.03$ . Significant positive effects  
89 of pre-season temperature on LOS appeared in fewer than 1% of pixels. The species showing the  
90 strongest decline in LOS related to warmer pre-season temperatures was European beech (*Fagus*  
91 *sylvatica*; Fig. 1a): pre-season temperature negatively affected LOS in 95% of analyzed pixels  
92 (39% statistically significant), with the standard deviation of inter-individual leaf-out times  
93 increasing by  $0.61 \pm 0.05$  days per degree of warming (Fig. 1b) and a mean linear correlation  
94 coefficient of  $0.37 \pm 0.06$ . When modelling the distribution of within-population leaf-out dates  
95 under different pre-season temperatures, we found that warming increases the inter-individual

96 variation in leaf-out times by up to 55%, which equates to lengthening the period during which  
97 95% of individuals in a population leaf-out by 11 days (Figs. 1e and S3).

98         Across all species, preseason temperature negatively affected FLS in 75% of analyzed  
99 pixels (18% statistically significant), with the standard deviation of inter-individual flowering  
100 times increasing by  $0.35 \pm 0.15$  days per degree of warming and a mean linear correlation  
101 coefficient of  $0.15 \pm 0.06$  (Figs. 1d and S2a). A significant positive effect of preseason  
102 temperature on FLS was found in only 2% of pixels. The species showing the strongest decline in  
103 FLS related to warmer preseason temperatures was the European alder (*Alnus glutinosa*):  
104 preseason temperature negatively affected FLS in 91% of analyzed pixels (33% statistically  
105 significant), with the standard deviation of inter-individual flowering times increasing by  $0.91 \pm$   
106  $0.27$  days per degree of warming and a mean linear correlation coefficient of  $0.30 \pm 0.08$ . When  
107 modelling the distribution of within-population flowering dates under different preseason  
108 temperatures, we found that warming increases leaf-out variation by up to 51%, which equates to  
109 lengthening the period during which 95% of individuals in a population initiate flowering by 23  
110 days (Figs. 1f and S4). In species, such as the crocus *Colchicum autumnale* and the heath *Calluna*  
111 *vulgaris*, where preseason temperature had little effect on the mean flowering date, preseason  
112 temperature also had little effect on FLS (Figs. S4 and S7).

113         To cross-validate the results obtained from the PEP data, we used common garden data  
114 consisting of leaf-out information on 209 individuals in 59 temperate woody species (minimally  
115 3 individuals per species) observed in the Munich Botanical garden from 2013 to 2018. A  
116 Bayesian hierarchical model, including preseason temperature as predictor variable, the standard  
117 deviation of inter-individual leaf-out times per year as response variable, and species as a random  
118 effect, showed a significantly negative effect of preseason temperature on LOS (lower panel Fig.

119 2a). On average, across all 59 species, the standard deviation of inter-individual leaf-out times  
120 increased by  $0.26 \pm 0.10$  (mean  $\pm$  CI) days per degree of warming.

121 Which factors cause the loss of inter-individual synchrony under climate warming? One  
122 possibility is that individuals reach their forcing sums required for leaf-out or flowering over a  
123 longer period because “within-spring warming speed” may be decreasing, flattening the  
124 temperature curve during spring (14,15). Thus, while the time span among individual leaf-out  
125 times might increase, differences in the forcing sums required until leaf-out or flowering among  
126 individuals might remain similar. To test this, we additionally calculated leaf-out/flowering  
127 synchrony as the standard deviation in individual forcing requirements (degree-days [DD] from 1  
128 January until leaf-out/flowering) [hereafter referred to as LOS-DD and FLS-DD] for both the  
129 PEP and Munich common garden data. In both data sets, we found a strong (albeit slightly  
130 weaker compared to the LOS/FLS analysis) negative relationship between preseason temperature  
131 and LOS-DD, i.e., individual differences in the forcing sums required until leaf-out or flowering  
132 are increasing with warmer preseasons (Figs. 2a and S6). We also simulated synchrony of spring  
133 phenology based on the Munich Jan–May temperatures over the past 60 years, assuming that  
134 phenology is solely driven by degree-day accumulation (no effect of photoperiod or winter  
135 chilling; see Fig. S5b) and this simulation revealed small losses of synchrony ( $R^2$  values between  
136 0.04 and 0.11 and regression coefficients between 0.15 and 0.43, see Fig. S5c). Together, those  
137 results show that a flattening temperature curve during spring can account for only a minor  
138 proportion of the declining inter-individual synchrony in the 72 species analyzed here.

139 Warmer preseasons in spring are associated with both reduced accumulation of winter  
140 chilling and shorter day-lengths at spring onset, and previous experiments on plant phenological  
141 strategies have shown pronounced differences among species in their reactions to day length and  
142 winter chilling (9–11). To test whether similar differences within species might explain the

143 decrease in LOS and FLS under climate warming detected in our *in-situ* data, we designed  
144 experiments in which we exposed trees to different regimes of spring warming, winter chilling,  
145 and day length. We additionally tested for the relative effects of winter chilling and day length on  
146 LOS and FLS using the PEP and Munich common garden data (for each year and individual, we  
147 calculated the winter chilling experienced until leaf-out and the day length for the date when an  
148 individual's average forcing requirement had been reached).

149         A first experiment addressed inter-individual variation in spring warming ('forcing'),  
150 day length, and winter chilling requirements in 11 mature *Fagus sylvatica* trees grown in the  
151 vicinity of the botanical garden in Munich. Twigs were cut at three dormancy stages during  
152 winter and exposed to different day-length regimes (8 h, 12 h, or 16 h light per day) and ambient  
153 spring-forcing conditions (mean daily temperature of 16°C). Note that in beech, leaf-out and  
154 flowering occur simultaneously because leaves and flowers are located on the same preformed  
155 shoots within overwintering buds. The results showed large differences in forcing and day-length  
156 requirements among individuals (Fig. 3a and b): for example, while in individual 1, day length  
157 had no effect on the amount of warming required until budburst, in individual 11, warming  
158 requirements were >2x lower under long-day than under short-day conditions (Fig. 3b). Chilling  
159 requirements differed little among individuals (compare slopes in Fig. 3c).

160         In a second experiment, we cut twigs of the same 11 beech trees at eight dormancy  
161 stages during winter and exposed them to natural day length. Temperatures were the same as in  
162 experiment 1, i.e., ambient. This allowed us to determine (i) the extent to which differential  
163 reliance on forcing, photoperiod, and winter chilling (as inferred from experiment 1) explains  
164 LOS/FLS under natural light conditions, and (ii) the effect of warmer winter and spring  
165 conditions on LOS/FLS. As in the *in situ* data from the Pan European Phenology network,  
166 synchrony strongly decreased under warmer spring conditions (Fig. 4 a, b), likely because of day-

167 length sensitivity differences among individuals (as documented for *F. sylvatica*; Fig. 3b): Under  
168 cold winter conditions, days are already long when spring warming occurs, reducing the effect of  
169 a tree's day length sensitivity on its leaf-out time, whereas with early spring warming, days are  
170 still short, preventing day-length sensitive trees from budburst. In natural populations, leaf-out  
171 advancement in day length-sensitive individuals, but not in day length-insensitive individuals,  
172 will thus increase the period of leaf-out under short day conditions. Both the experimental and the  
173 PEP *in situ* data confirm this idea, showing that (i) phenological variation among individuals  
174 strongly decreases under short day conditions (Figs. 2b and 3b) and (ii) genetic differences in  
175 day-length requirements are the single most important factor explaining variation in budburst  
176 times (Fig. 4c, d).

177         This insight explains why, especially in *Fagus sylvatica*, in which day length has the  
178 most pronounced effect on spring phenology (10,11), LOS is strongly affected by pre-season  
179 temperatures (Fig. 1c). By contrast, in day-length insensitive species, such as silver birch *Betula*  
180 *pendula* and Norway spruce *Picea abies* (11), pre-season warming has a smaller (but still  
181 significant) effect on LOS, suggesting that heritable differences in day-length sensitivity are a  
182 major driver of within-population phenological variation. In our common garden data, the  
183 standard deviation of inter-individual leaf-out times increased by  $0.09 \pm 0.02$  (mean  $\pm$  CI) days  
184 per decrease in one chilling day, and the standard deviation of inter-individual forcing  
185 requirements increased by  $0.23 \pm 0.06$  degree-days per decrease in one chilling day (lower panel  
186 Fig. 2b), indicating that individual differences in the sensitivity to winter chilling also contribute  
187 to the observed loss of phenological synchrony under climate warming.

188         What biological consequences can be expected from less synchronized leaf-out and  
189 flowering of the individuals of a species? With regard to vegetative development,



190 precocious leaf unfolding under warm springs increases the risk of late frost damage (16–18), but  
191 also potential carbon gain due to earlier photosynthetic activity (19). This risk-return trade-off  
192 will affect selection on suitable genotypes under future conditions, and the increasing spread of  
193 leaf-out should increase the selective importance of spring phenology. Whether opportunistic  
194 phenological strategies (relying on temperature as the main trigger) or conservative strategies  
195 (relying on day length and/or winter chilling as a buffer against highly variable spring  
196 temperatures) will be favored in the future will be region-specific, depending on the relative  
197 advancement rates of spring warming and late frost events. In continental regions, where the  
198 advent of spring is relatively invariable (low late frost risk), phenological strategies reliant on  
199 temperature should be favored (20).

200         With regard to flowering, decreased synchrony among individuals, as already strongly  
201 evident in *Alnus glutinosa* (Fig. 1f), should lead to reduced inter-individual pollen transfer.  
202 Strong divergence in flowering times among individuals also might lead to assortative mating  
203 (depending on incompatibility systems), possibly promoting local adaptation (21–23) and should  
204 act as a buffer against climate change-induced phenological mismatch between plants and leaf-  
205 feeding or pollen-collecting insects (24). Rapid adaptive responses, for instance a filtering out of  
206 extreme phenotypes through increased mortality or reduced reproduction, might counteract  
207 warming-induced losses of inter-individual synchrony. Such selection of the standing variation  
208 can occur very rapidly, at least in herbaceous plants (25).

209         While our results show that climate warming causes a loss of phenological synchrony  
210 among the individuals of a population, a study of leaf-out along elevational gradients in four  
211 European tree species, between 1960–2016, revealed that leaf-out times at higher and lower  
212 elevations are today compressed into a shorter time window compared to 58 years ago (26).  
213 These findings do not contradict those of the present study because populations growing at high

214 elevations were able to advance their phenology more than those at lower elevations for which  
215 chilling and/or day-length requirements are no longer fulfilled (Fig. S8). As a result, the leaf-out  
216 times of high- and low-elevation populations are converging (26). At the same time, however,  
217 differences in day-length sensitivity (as well as chilling and temperature sensitivity) among the  
218 individuals at any one elevation under climate warming are resulting in diverging flowering and  
219 leaf-out times.

220         The overall prediction from the present findings is that human-caused climate warming is  
221 leading to plant phenologies that are more heterogeneous within populations and more uniform  
222 among populations (over altitude or latitude). The rapid loss of reproductive and vegetative  
223 synchrony in European plants also predicts changes in their gene flow and trophic interactions,  
224 although community-wide consequences are presently unknown.

225

## 226 **Conclusion**

227 The synchrony of developmental stages among organisms is a critical aspect of ecosystem  
228 functioning. Here, based on massive ground observations and climate-manipulation experiments,  
229 we show that global warming is altering within-population synchrony of leaf-out and flowering  
230 dates in temperate plants, with warmer temperatures reducing inter-individual synchrony by up to  
231 55%. Experiments suggest that individual genetic differences in the sensitivity to day-length  
232 and/or winter chilling underlie the loss of synchrony, and future climate warming is expected to  
233 further strengthen this trend. These results predict consequences for gene flow and trophic  
234 interactions, but also emphasize the importance of adaptation when forecasting future plant  
235 growth and productivity.

236

237

## 238 **Materials and Methods**

239

240 *Analysis of leaf-out and flowering synchrony (LOS and FLS) using the PEP database*

241 **Data sets.** *In situ* phenological observations were obtained from the Pan European Phenology

242 network (<http://www.pep725.eu/>), which provides open-access European phenological data.

243 Leaf-out dates were analyzed for 9 species, flowering dates for 15. Data from Germany, Austria,

244 and Switzerland were used for the analysis. For the angiosperm woody species, leaf-out was

245 defined as the date when unfolded leaves, pushed out all the way to the petiole, were visible on

246 the respective individual (BBCH 11, Biologische Bundesanstalt, Bundessortenamt und

247 Chemische Industrie). For the two conifers *Larix decidua* and *Picea abies* leaf-out was defined as

248 the date when the first needles started to separate (“mouse-ear stage”; BBCH 10). Flowering was

249 defined as the date of beginning of flowering (BBCH 60). We removed (i) individuals, for which

250 the standard deviation of phenological observations across years was higher than 25 and (ii) leaf-

251 out and flowering dates that deviated from an individual’s median more than 3 times the median

252 absolute deviation (moderately conservative threshold) (26).

253 **Analysis.** To test for an effect of spring temperature on inter-individual leaf-out synchrony (LOS)

254 and flowering synchrony (FLS), we divided the study area into pixels of one degree resolution

255 (~110 x 85 km), an area that can reasonably be considered as reflecting populations, at least for

256 wind-pollinated woody species (see discussion on herbs in the main text). To allow for within-

257 pixel comparisons of LOS and FLS between years, data from the same individuals had to be used

258 each year. To achieve this, we kept only pixels for which there were at least three individuals

259 with data for the same 15 years. For each pixel, we deleted all (i) individuals growing at altitudes

260 that deviated by >200 m from the average altitude of all individuals within the pixel, and (ii)

261 years that had less than 90% plant-coverage, i.e., data from at least 90% of the individuals within

262 the pixel had to be available for the respective year, otherwise the year was excluded from the  
263 analysis. This data cleaning left us with a total of 12,536 individuals, 317,672 phenological  
264 observations (individuals x year), and a median time-series length of 25 years (minimally 15  
265 years, maximally 48 years). The number of individuals within pixels (per species and  
266 phenological stage) ranged between 3 and 53 (median = 12). See Figs. S1b and S2b for  
267 information on the number of pixels used per species.

268 For each year and species, LOS and FLS within pixels were then calculated as the  
269 standard deviation of leaf-out or flowering dates. Additionally, we calculated the standard  
270 deviation of forcing requirements among individuals (subsequently referred to as LOS-DD [leaf-  
271 out synchrony degree-days] and FLS-DD [flowering synchrony degree-days]) to test if greater  
272 phenological variation among individuals can be explained by increasing variation in forcing  
273 requirements. Individual forcing requirements until leaf-out were calculated as the sum of degree-  
274 days (DD) from 1 January until leaf-out or flowering using 5°C as base temperature (e.g., ref.  
275 27):

$$276 \quad DD_{sum}(t) = \sum_{t_0}^{t_{LO}} T_t - 5$$

277 where  $DD_{sum}$  is the accumulated degree days until leaf unfolding,  $t_{LO}$  is the day of leaf unfolding,  
278  $T_t$  is the mean daily temperature on day  $t$ , and  $t_0$  is the start date for forcing accumulation, which  
279 was fixed at 1 January. For each year and species, LOS-DD and FLS-DD within pixels were then  
280 calculated as the standard deviation of forcing requirements until leaf-out or flowering dates.

281 The daily mean air temperature at each site was derived from a gridded climatic data set  
282 of daily mean temperature at 0.5° spatial resolution (approximately 50 km, ERA-WATCH) (28).  
283 For each year, pre-season temperature within pixels was defined as the average temperature  
284 during the 60 days prior to the average leaf unfolding or flowering date within the respective

285 pixel, which is the period for which the correlation coefficient between phenological event and  
286 temperature is highest (29).

287 To test if shortened photoperiods and/or reduced winter chilling explain the decrease in  
288 phenological synchrony under warmer preseasons, for each year, pixel, and species, we  
289 calculated the average chilling hours until leaf-out or flowering and the average photoperiod (PP)  
290 at the date when the average forcing requirements until leaf-out or flowering were fulfilled.  
291 Chilling hours were calculated on basis of 6-hourly temperature data (CRU-NCEP, spatial  
292 resolution of 0.5°; <https://crudata.uea.ac.uk/cru/data/ncep/>), as the sum of hours from 1  
293 November until leaf-out/flowering with an average temperature between 0°C and 5°C (e.g., ref  
294 29):

$$295 \quad Ch_{sum}(t) = \sum_{t_0}^{t_{LO}} 1 \quad \text{if } 0 \leq T_t \leq 5$$

296 where  $Ch_{sum}$  is the sum of chilling hours until leaf unfolding,  $t_{LO}$  is the day of leaf unfolding,  $T_t$  is  
297 the hourly mean temperature on hour  $t$ , and  $t_0$  is the start date for chilling accumulation, which  
298 was fixed at 1 November in the year before leaf unfolding.

299 PP was calculated as a function of latitude and DOY (30):

$$300 \quad PP = 24 - \frac{24}{\pi} \cos^{-1} \left[ \frac{\sin \frac{0.8333\pi}{180} + \sin \frac{L\pi}{180} \sin \varphi}{\cos \frac{L\pi}{180} * \cos \varphi} \right] \quad (3)$$

$$302 \quad \varphi = \sin^{-1}(0.29795 * \cos \theta) \quad (4)$$

$$303 \quad \theta = 0.2163108 + 2 * \tan^{-1}(0.9671396 * \tan(0.0086 * (DOY - 186))) \quad (5)$$

304 where  $L$  is the latitude of the phenological site.

306

307

308 **Statistical analyses.**

309 Within each pixel we applied linear models to test for an effect of preseason temperature,  
310 photoperiod, and winter chilling on phenological synchrony (LOS, LOS-DD, FLS and FLS-DD).  
311 We then determined the frequency distributions for the correlation coefficients between  
312 phenological synchrony and preseason temperature across all species and sites. For each species,  
313 we applied *t*-tests to detect whether the average of all correlation coefficients obtained for each  
314 pixel differs from zero. To model changes in the distribution of within-population leaf-out and  
315 flowering dates (means and standard deviations) in response to temperature, we applied mixed-  
316 effects models using average leaf-out / flowering dates or LOS / FLS as response variables,  
317 preseason temperature as explanatory variable, and site as a random effect to control for the use  
318 of different sites in the model.

319 To test for the relative effects of preseason temperature on (i) inter-individual variation  
320 in leaf-out/flowering date (LOS / FLS) and (ii) inter-individual variation in forcing requirements  
321 until leaf-out/flowering (LOS-DD / FLS-DD) we applied hierarchical Bayesian models. To test  
322 for the effects of winter chilling and day-length on phenological synchrony, we applied  
323 hierarchical Bayesian models including both winter chilling until leaf-out and day length at the  
324 date when the average forcing requirements until leaf-out or flowering were fulfilled as predictor  
325 variables. The use of a Bayesian framework allowed us to fit slope parameters across traits  
326 simultaneously without concerns of multiple testing or *P*-value correction. All models included  
327 random effects for (i) species (to address within-species rather than between species phenological  
328 synchrony) and (ii) pixels (to address within-population rather than between-population  
329 phenological synchrony). To allow for direct effect size comparisons, all continuous variables

330 were standardized by subtracting their mean and dividing by 2 SD before analysis (31). The  
331 resulting posterior distributions are a direct statement of the probability of our hypothesized  
332 relationships. Effective posterior means  $\pm$  95% confidence intervals are shown in Fig. 2.

333 To parameterize our models, we used the JAGS implementation (32) of Markov chain  
334 Monte Carlo methods in the R package R2JAGS (33). We ran three parallel MCMC chains for  
335 200,000 iterations with a 50,000-iteration burn-in and evaluated model convergence with the  
336 Gelman and Rubin (34) statistic. Noninformative priors were specified for all parameter  
337 distributions, including normal priors for  $\alpha$  and  $\beta$  coefficients (fixed effects; mean = 0; variance =  
338 1,000), and uniform priors between 0 and 100 for the variance of the random intercept effects,  
339 based on de Villemereuil and colleagues (35). All statistical analyses relied on R 3.2.2 (36).

340

#### 341 *Analysis of leaf-out synchrony (LOS) using common garden data from 2013–2018*

342 Between 2013 and 2018 we observed the leaf-out dates of 209 individuals in 59 temperate woody  
343 species (minimally 3 individuals per species) in the Munich Botanical garden (see Supplementary  
344 Materials Table 1 for a list of species). An individual was scored as having leafed out when at  
345 least three branches had unfolded leaves pushed out all the way to the petiole (37). To test  
346 whether the trends observed in the PEP analysis are consistent with our common garden data, the  
347 same parameters (LOS, LOS-DD, preseason temperature, winter chilling, and photoperiod) were  
348 calculated as described above (*Analysis of leaf-out and flowering synchrony (LOS and FLS)*  
349 *using the PEP database*). We then applied hierarchical Bayesian models including species  
350 random effects (see paragraph above) to test for the effects of preseason temperature, winter  
351 chilling, and day-length on LOS and LOS-DD.

352

353

354 *Twig cutting experiments and phenological scoring*

355 To study the extent of intraspecific variation in leaf-out strategy (within-species variation in  
356 photoperiod, chilling, and forcing requirements) and its implications under climate warming, we  
357 conducted twig-cutting experiments on mature *Fagus sylvatica* individuals grown in the vicinity  
358 of Munich. Experiments have demonstrated that twig cuttings precisely mirror the phenological  
359 behavior of their donor plants and therefore are adequate proxies for inferring phenological  
360 responses of adult trees to climatic changes (27,38). We used twigs approximately 50 cm in  
361 length, and immediately after cutting, we disinfected the cut section with sodium hypochlorite  
362 solution (200 ppm active chlorine), cut the twigs a second time, and then placed them in 0.5 l  
363 glass bottles filled with 0.4 l cool tap water enriched with the broad-spectrum antibiotics  
364 gentamicin sulfate ( $40 \mu\text{g l}^{-1}$ ; Sigma-Aldrich, Germany) (11,27). We then transferred the cut  
365 twigs to climate chambers and kept them under short (8 h), intermediate (12 h), or long day (16  
366 h) conditions (see Experiment 1 below), or natural day length (Experiment 2 below).  
367 Temperatures in the climate chambers were held at  $12^{\circ}\text{C}$  during the night and  $20^{\circ}\text{C}$  during  
368 the day, with an average daily temperature of  $16^{\circ}\text{C}$  to simulate forcing temperatures. Illuminance  
369 in the chambers was about 8 klux ( $\sim 100 \mu\text{mol s}^{-1} \text{m}^{-2}$ ). Relative air humidity was held between  
370 40% and 60%. To account for within-individual variation, we used 10 replicate twigs per  
371 individual treatment and monitored bud development every second day. For each individual and  
372 treatment, we then calculated the mean leaf-out date out of the first eight twigs that leafed out. A  
373 twig was scored as having leafed out when three buds had unfolded leaves pushed out all the way  
374 to the petiole (37). Forcing requirements until leaf-out were calculated as the sum of degree-days  
375 [outside of and in climate chambers] from 10 December (1<sup>st</sup> collection date) until leaf-out using



376 5°C as base temperature (e.g., ref. 27). Chilling hours were calculated as the sum of hours from 1  
377 November until leaf-out with an average temperature between 0°C and 5°C.

378  
379 *Experiment 1: Differences in photoperiod sensitivity among Fagus sylvatica individuals*  
380 In winter 2014/2015, twigs of 11 individuals (10 replicate twigs per individual and treatment) of  
381 *Fagus sylvatica* were collected at three dates during winter (22 Dec 2014, 6 Feb 2015, and 21  
382 Mar 2015) and brought into climate chambers. Additionally, we collected twigs from one  
383 individual each of *Fagus crenata* and *Quercus robur*. Temperatures in the chambers ranged from  
384 12°C during night to 20°C during day, with an average daily temperature of 16°C. Day length in  
385 the chambers was set to 8h, 12h, or 16h.

386 Individual photoperiod sensitivity was defined as the slope of the function between day-  
387 length treatment and accumulated degree days (>5°C) until leaf-out (twigs were collected on 21  
388 March; see Fig. 3b). The steeper the slope, the stronger the effect of photoperiod on the amount  
389 of warming required for leaf-out. A flat slope indicates that photoperiod has no effect on the  
390 timing of leaf-out.

391 Individual chilling sensitivity was defined as the slope of the function between chilling  
392 treatment (collection date) and accumulated degree days (>5°C) until leaf-out when twigs were  
393 kept under constant 16-h day length (see Fig. 3c). The steeper the slope, the stronger the effect of  
394 chilling on the amount of warming required for leaf-out.

395 Individual forcing requirement was defined as the accumulated degree days (>5°C) until  
396 leaf-out under long chilling (21 March collection) and constant 16-h day length (see Fig. 3a).  
397 Under such conditions, chilling requirements and photoperiod requirements should be largely  
398 met, and thus the remaining variation in leaf-out dates should be largely attributable to  
399 differences in forcing (warming) requirements.

400 *Experiment 2: Different reactions to climate warming among Fagus sylvatica individuals*

401 In winter 2015/2016, twigs from the same 11 individuals were harvested every two weeks (from  
402 10 December until 21 March) and kept under the same temperature conditions applied in  
403 experiment 1 (12°C during night to 20°C during day), with natural day length. This allowed us to  
404 test if those individuals with no/little photoperiod sensitivity would advance their leaf-out more  
405 under short winter conditions than photoperiod-sensitive individuals, and to determine the  
406 relative effect of individual variation in photoperiod requirements, chilling requirements and  
407 forcing requirements on leaf-out variation under different winter/spring conditions (Fig. 4).  
408 Within-species leaf-out synchrony (LOS) was calculated as the standard deviation of individual  
409 leaf-out dates. To analyze which leaf-out cues (photoperiod, chilling, and forcing requirements)  
410 best explain leaf-out variation among individuals, we applied a multivariate linear model,  
411 including individual forcing, photoperiod, and chilling requirements (as inferred from experiment  
412 1) as explanatory variables. To express the total variation in leaf-out dates that can be attributed  
413 to each trait, we used ANOVA sums of squares (see Fig. 4d).

414 To infer which percentage of the variation in leaf-out dates is due to treatment effects,  
415 between-individual variation, or within-individual variation, we calculated variance components  
416 by applying a random-effects-only model including treatments and individuals as random effects  
417 (individuals nested within treatments). Results show that of the total leaf-out variation among  
418 twigs, 52% can be explained by between-individual variation, 33% by treatments, and only 15%  
419 by within-individual variation (Supplementary Fig. S9).

420

421

422

423

424 **References**

- 425 1. Anker Ims R (1990) The ecology and evolution of reproductive synchrony. *Trends Ecol Evol*  
426 5:135–140.
- 427 2. Fitter AH, Fitter RS (2002) Rapid changes in flowering time in British plants. *Science*  
428 296:1689–1691.
- 429 3. Sherry RA, Zhou X, Gu S, Arnone JA, Schimel DS, *et al.* (2007) Divergence of reproductive  
430 phenology under climate warming. *Proc Natl Acad Sci USA* 104:198–202.
- 431 4. Thackeray SJ, Henrys PA, Hemming D, Bell JR, Botham MS, Burth S, *et al.* (2016)  
432 Phenological sensitivity to climate across taxa and trophic levels *Nature* 535:241–245.
- 433 5. Menzel A, Fabian P (1999) Growing season extended in Europe. *Nature* 397:659.
- 434 6. Chuine I, Beaubien E (2001) Phenology is a major determinant of temperate tree range. *Ecol*  
435 *Lett* 4:500–510.
- 436 7. Elzinga JA, Atlan A, Biere A, *et al.* (2007) Time after time: flowering phenology and biotic  
437 interactions. *Trends Ecol Evol* 22:432–439.
- 438 8. Chuine I (2010) Why does phenology drive species distribution? *Phil Trans R Soc B*  
439 365:3149–3160.
- 440 9. Zohner CM, Benito, BM, Fridley JD, Svenning J-C, Renner SS (2017) Spring predictability  
441 explains different leaf-out strategies in the woody floras of North America, Europe, and  
442 East Asia. *Ecol Lett* 20:452–460.
- 443 10. Laube J, *et al.* (2014) Chilling outweighs photoperiod in preventing precocious spring  
444 development. *Glob Change Biol* 20:170–182.

- 445 11. Zohner CM, Benito BM, Svenning J-C, Renner SS (2016) Day length unlikely to constrain  
446 climate-driven shifts in leaf-out times of northern woody plants. *Nat Clim Change*  
447 6:1120–1123.
- 448 12. Hart SP, Schreiber SJ, Levine JM (2016) How variation between individuals affects species  
449 coexistence. *Ecol Lett* 19:825–38.
- 450 13. Augspurger CK (2013) Reconstructing patterns of temperature, phenology, and frost damage  
451 over 124 years: spring damage risk is increasing. *Ecology* 94:41–50.
- 452 14. Wang C, Cao R, Chen J, Rao Y, Tang Y (2015) Temperature sensitivity of spring vegetation  
453 phenology correlates to within-spring warming speed over the Northern Hemisphere.  
454 *Ecol Indic* 50:62–68.
- 455 15. Wang C, Tang Y, Chen J (2016) Plant phenological synchrony increases under rapid within-  
456 spring warming. *Sci Rep* 6:25460.
- 457 16. Augspurger CK (1981) Reproductive synchrony of a tropical shrub: Experimental studies on  
458 effects of pollinators and seed predators in *Hybanthus prunifolius* (Violaceae). *Ecology*  
459 62:775–788.
- 460 17. Kollas C, Körner C, Randin CF (2014) Spring frost and growing season length co-control the  
461 cold range limits of broad-leaved trees. *J Biogeogr* 41:773–783.
- 462 18. Vitasse Y, Lenz A, Körner C (2014) The interaction between freezing tolerance and  
463 phenology in temperate deciduous trees. *Front Plant Sci* 5:541.
- 464 19. Keenan TF, *et al.* (2014) Net carbon uptake has increased through warming-induced changes  
465 in temperate forest phenology. *Nat Clim Change* 4:598–604.
- 466 20. Körner C, Basler D (2010) Phenology under global warming. *Science* 327:1461–1462.
- 467 21. Antonovics J, Bradshaw AD (1970) Evolution in closely adjacent plant populations Part 8.  
468 Clinal patterns at a mine boundary. *Heredity* 25:349–362.

- 469 22. Kirkpatrick M (2000) Reinforcement and divergence under assortative mating. *Proc Royal*  
470 *Soc B* 267:1649–1655.
- 471 23. Weis AE, Kossler TM (2004) Genetic variation in flowering time induces phenological  
472 assortative mating: quantitative genetic methods applied to *Brassica rapa*. *Am J Bot*  
473 91:825–836.
- 474 24. Renner SS, Zohner CM (2018) Climate change and phenological mismatch in trophic  
475 interactions among plants, insects, and vertebrates. *Annu Rev Ecol Evol Syst* in press.
- 476 25. Jump AS, Penuelas J (2005) Running to stand still: adaptation and the response of plants to  
477 rapid climate change. *Ecology Letters* 8: 1010–1020.
- 478 26. Vitasse Y, Signarbieux C, Fu YH (2018) Global warming leads to more uniform spring  
479 phenology across elevations. *Proc Natl Acad Sci USA*. doi/10.1073/pnas.1717342115
- 480 27. Zohner CM, Renner SS (2015) Perception of photoperiod in individual buds of mature trees  
481 regulates leaf-out. *New Phytol* 208:1023–1030.
- 482 28. Beer C, et al. (2014) Harmonized European long-term climate data for assessing the effect of  
483 changing temporal variability on land-atmosphere CO<sub>2</sub> fluxes. *J Clim* 27:4815–4834.
- 484 29. Fu YH, et al. (2015) Declining global warming effects on the phenology of spring leaf  
485 unfolding. *Nature* 526:104–107.
- 486 30. Forsythe WCR, Rykiel EJ, Stahl RS, Wu H, Schoolfield RM (1995) A model comparison for  
487 daylength as a function of latitude and day of year. *Ecol Modell* 80:87–95.
- 488 31. Gelman A, Hill J (2007) Data analysis using regression and multilevel/hierarchical models.  
489 Cambridge, UK: Cambridge University Press.
- 490 32. Plummer M (2003) JAGS: a program for analysis of Bayesian graphical models using Gibbs  
491 sampling. In: Hornik K, Leisch F, Zeileis A, eds. Proceedings of the 3rd International

- 492            Workshop on Distributed Statistical Computing (DSC 2003). Vienna, Austria: Achim  
493            Zeileis.
- 494    33. Su Y-S, Yajima M (2014) R2jags: a package for running JAGS from R. R package version  
495            0.04-03. [WWW document] URL <http://CRAN.R-project.org/package=R2jags>
- 496    34. Gelman A, Rubin DB (1992) Inference from iterative simulation using multiple sequences.  
497            *Statistical Science* 7:457–472.
- 498    35. de Villemereuil P, Wells JA, Edwards RD, Blomberg SP (2012) Bayesian models for  
499            comparative analysis integrating phylogenetic uncertainty. *BMC Evolutionary Biology*  
500            12:102.
- 501    36. R Core Team. 2018. R: a language and environment for statistical computing, version 3.4.1.  
502            Vienna, Austria: R Foundation for Statistical Computing. URL [http://www.R-](http://www.R-project.org/)  
503            [project.org/](http://www.R-project.org/)
- 504    37. IPG. Phenological observation guide of the International Phenological Gardens. International  
505            Phenological Gardens of Europe, Berlin, Germany. [WWW document] URL  
506            [https://www.agrar.hu-berlin.de/en/institut-en/departments/dntw-en/agrarmet-](https://www.agrar.hu-berlin.de/en/institut-en/departments/dntw-en/agrarmet-en/phaenologie/ipg/IPG_ObsGuide.pdf)  
507            [en/phaenologie/ipg/IPG\\_ObsGuide.pdf](https://www.agrar.hu-berlin.de/en/institut-en/departments/dntw-en/agrarmet-en/phaenologie/ipg/IPG_ObsGuide.pdf) [accessed 1 August 2017].
- 508    38. Vitasse Y, Basler D (2014) Is the use of cuttings a good proxy to explore phenological  
509            responses of temperate forests in warming and photoperiod experiments? *Tree Physiol*  
510            34:174–183.
- 511
- 512
- 513
- 514

515 **Acknowledgements**

516 We thank D. März and V. Sebald for help with the experiments and R. Ricklefs for comments on  
517 the manuscript. This work benefitted from the sharing of expertise within the DFG priority  
518 program SPP 1991.

519

520

521 **Statement of authorship:** CMZ designed the study, performed the experiments and analyzed the  
522 data. LM contributed to the analyses. CMZ and SSR wrote the manuscript.

523

524

525

526

527

528

529

530

531

532

533

534

535

536

537

538

539

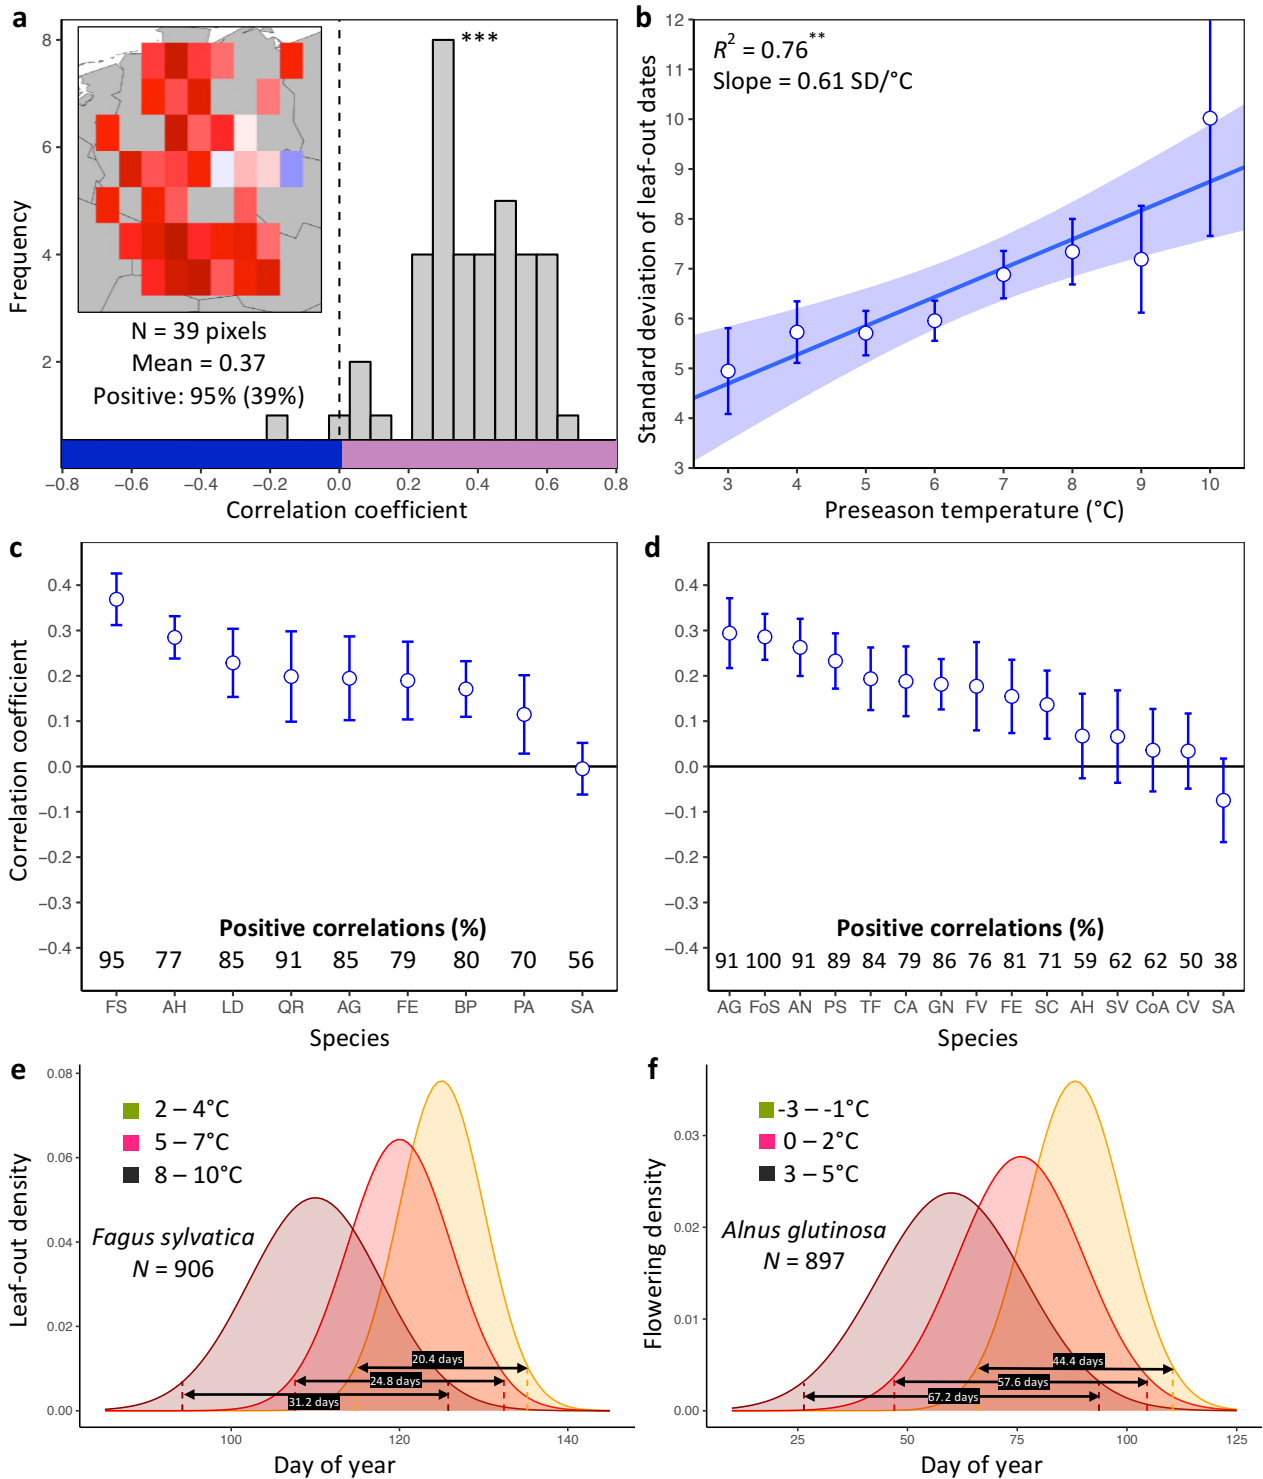

540  
541  
542  
543  
544  
545  
546  
547  
548  
549  
550  
551  
552  
553  
554  
555  
556  
557



558 **Figure 1 | Loss of inter-individual synchrony in leaf-out and flowering with increasing**  
559 **temperatures. a**, Frequency distribution showing the correlations between the standard deviation  
560 of inter-individual leaf-out times and spring temperature for *Fagus sylvatica* at 39 pixels (1° x 1°  
561 areas). Mean = Mean correlation coefficients across all sites (*N*), Positive = percentage of  
562 positive correlations and the percentage of statistically significant positive correlations (in  
563 parentheses). Inset shows a heat map of the correlations at the 39 pixels. **b**, Effect of preseason  
564 temperature on the standard deviation of inter-individual leaf-out times (mean ± SEM) in *F.*  
565 *sylvatica* averaged across all years and sites. **c, d**, Mean Pearson correlation coefficients (± 95%  
566 confidence intervals) for the effect of spring temperature on the standard deviation of inter-  
567 individual leaf-out (**c**) or flowering times (**d**). *Positive correlations* = percentage of the total  
568 number of positive correlations. See Figs. S1b and S2b for number of sites (1° x 1° areas) in  
569 which the relationship was analyzed. **e, f**, Distributions of inter-individual (**e**) leaf-out dates in *F.*  
570 *sylvatica* and (**f**) flowering dates in *Alnus glutinosa* under different spring temperatures. *N* =  
571 Number of available year x pixel (1° x 1° areas) combinations. To model the distributions (means  
572 and standard deviations), mixed-effects models were applied including site (pixel) as a random  
573 effect. See Figs. S3 and S4 for distributions of all 20 analyzed species. AG, *Alnus glutinosa*; AH,  
574 *Aesculus hippocastanum*; AN, *Anemone nemorosa*; BP, *Betula pendula*; CA, *Corylus avellana*;  
575 CoA; *Colchicum autumnale*; CV, *Calluna vulgaris*; FE, *Fraxinus excelsior*; FoS, *Forsythia*  
576 *suspensa*; FS, *Fagus sylvatica*; FV, *Fragaria vesca*; GN, *Galanthus nivalis*; LD, *Larix decidua*;  
577 PA, *Picea abies*; PS, *Prunus spinosa*; QR, *Quercus robur*; SA, *Sorbus aucuparia*; SC, *Salix*  
578 *caprea*; SV, *Syringa vulgaris*; TF, *Tussilago farfara*.

579  
580  
581  
582  
583  
584  
585  
586  
587  
588  
589  
590  
591  
592  
593  
594  
595  
596  
597  
598  
599  
600  
601

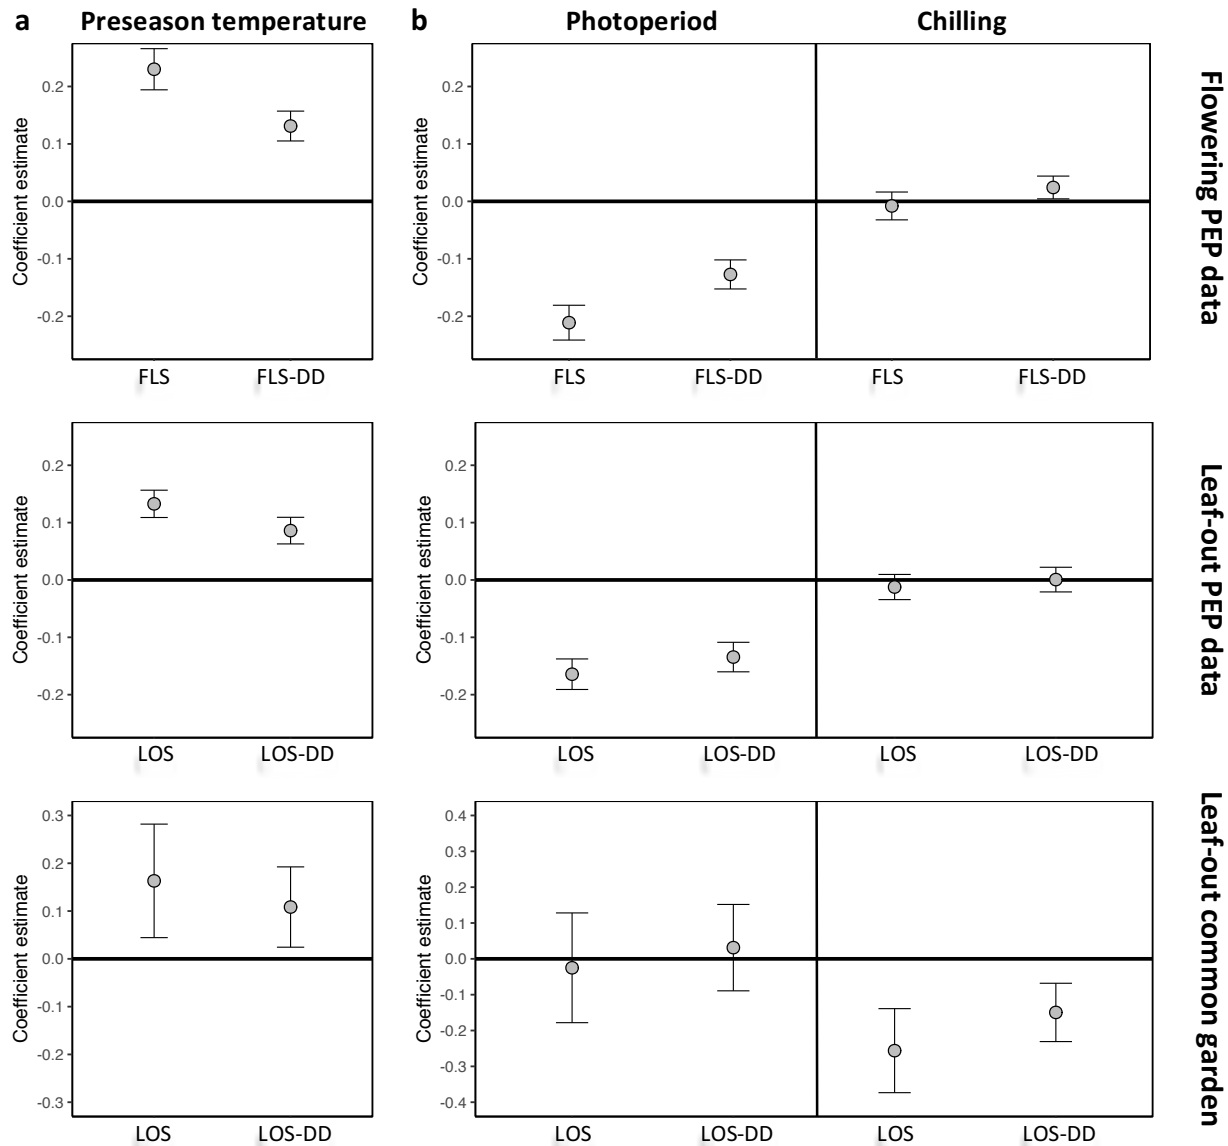

**Figure 2 | The environmental drivers of inter-individual phenological synchrony as inferred from (i) flowering times (upper panels) and (ii) leaf-out times (middle panels) using the PEP data, and (iii) common garden observations on leaf-out times. a,** Coefficient estimates (effective posterior means  $\pm$  95% credible intervals) for the effect of preseason temperature (mean temperature 2 months before a species' mean leaf-out/flowering date) on inter-individual phenological synchrony measured either as the standard deviation in leaf-out/flowering dates (LOS / FLS; left) or the standard deviation in degree-day (DD) requirements among individuals (LOS-DD / FLS-DD; right). **b,** Coefficient estimates for the effects of photoperiod and winter chilling on inter-individual leaf-out synchrony. Hierarchical Bayesian linear models were applied using information on 13 (upper), 9 (middle), and 59 species (lower panels). To account for within-species rather than among-species synchrony, all models include species random effects. The models using the PEP data (upper and middle panels) additionally include site random effects ( $1^\circ$  pixels) to address within-population phenological synchrony. All variables were standardized to allow for direct effect size comparisons.

620

621  
622  
623

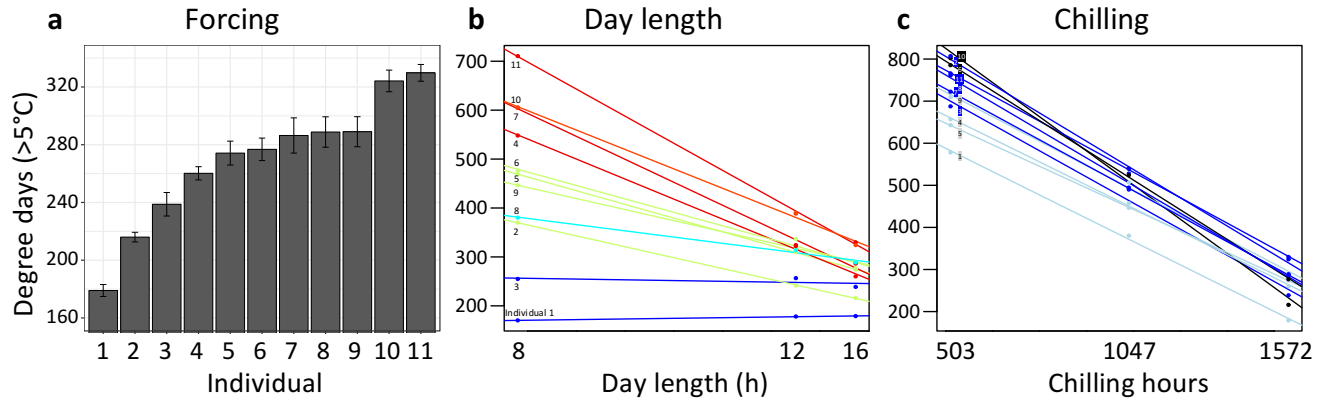

624  
625 **Figure 3 | Individual differences in the forcing (a), day-length (b), and chilling (c)**  
626 **requirements among 11 beech trees (*F. sylvatica*; Experiment 1).** a, Mean (± SEM) forcing  
627 requirements (accumulative degree days >5°C) until budburst under long chilling and constant  
628 16-h day length. b, Degree days until budburst at 8-h, 12-h, and 16-h day length (collection date:  
629 21 March 2015). Colours according to slope (red: steep slope; blue: no slope). c, Degree days  
630 until budburst under short, intermediate, and long chilling (collection dates: 22 Dec 2014, 6 Feb  
631 2015, 21 March 2015) and 16-h day length. Colours according to slope (dark blue: steep slope;  
632 light blue: no slope).

633  
634  
635  
636  
637  
638  
639  
640  
641  
642  
643  
644  
645  
646  
647  
648  
649  
650  
651

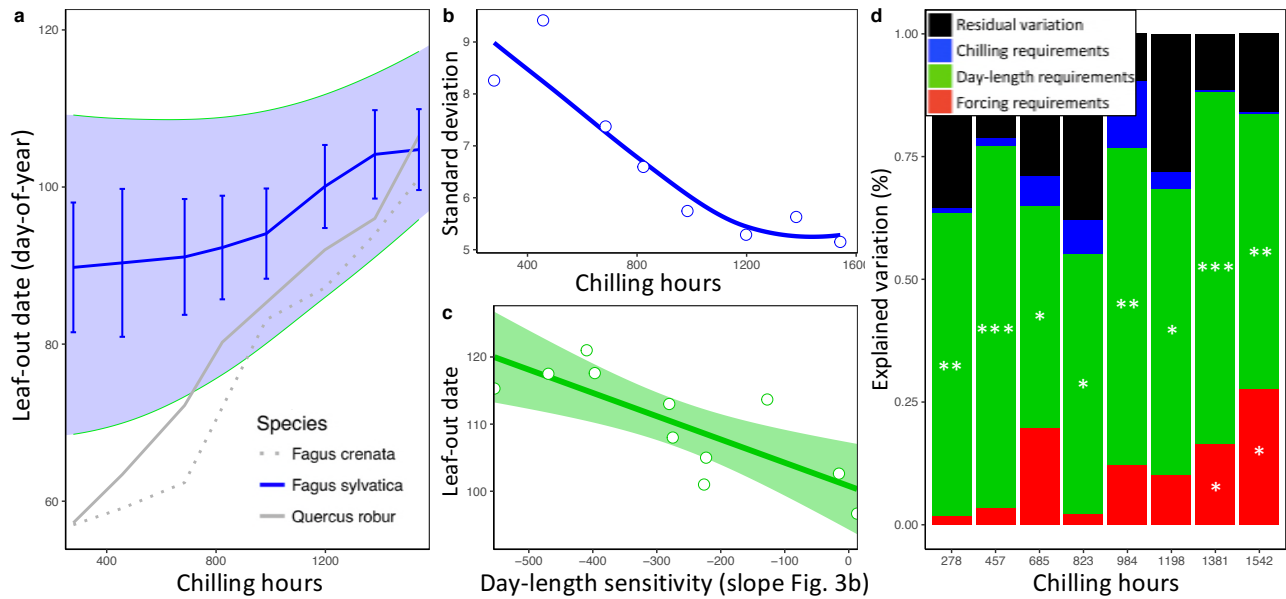

652

653

654 **Figure 4 | Loss of phenological synchrony with climate warming is explained by contrasting**  
 655 **day-length sensitivities in *Fagus sylvatica*.** **a, b**, Experiment 2. **a**, Leaf-out dates of *Fagus*  
 656 *sylvatica* (blue), *Fagus crenata* (dotted grey), and *Quercus robur* (grey) under varying winter  
 657 lengths (chilling hours = sum of hours from 1 November until leaf-out with an average  
 658 temperature between 0°C and 5°C). Bars show the standard deviation of average leaf-out dates  
 659 among 11 *F. sylvatica* individuals. The shaded area shows the difference between the leaf-out  
 660 date of the first flushing twig of the first individual and the last twig of the last individual to  
 661 leaf-out, using a LOESS smoothing function. For *F. crenata* and *Q. robur*, we investigated one  
 662 individual each and therefore do not report inter-individual variation. **b**, Standard deviation of  
 663 leaf-out dates among 11 *F. sylvatica* individuals at different winter lengths (chilling levels) and  
 664 natural day length. **c**, The effect of individual day-length sensitivity on the timing of leaf  
 665 unfolding when twigs were collected on 10 December 2015. Note the reversed x-axis scale, i.e.,  
 666 smaller values indicate higher day-length sensitivity. **d**, Variables explaining the sequence of  
 667 leaf-out dates of 11 *F. sylvatica* individuals at eight different chilling levels. The percentage of  
 668 leaf-out variation (derived from the ANOVA sums of squares) that can be explained by  
 669 individual forcing requirements (red), day-length requirements (green), chilling requirements  
 670 (blue), and the remaining residuals, i.e., unexplained variation (black). \* $P < 0.05$ ; \*\* $P < 0.01$ ;  
 671 \*\*\* $P < 0.001$ .

## **Supplementary Material**

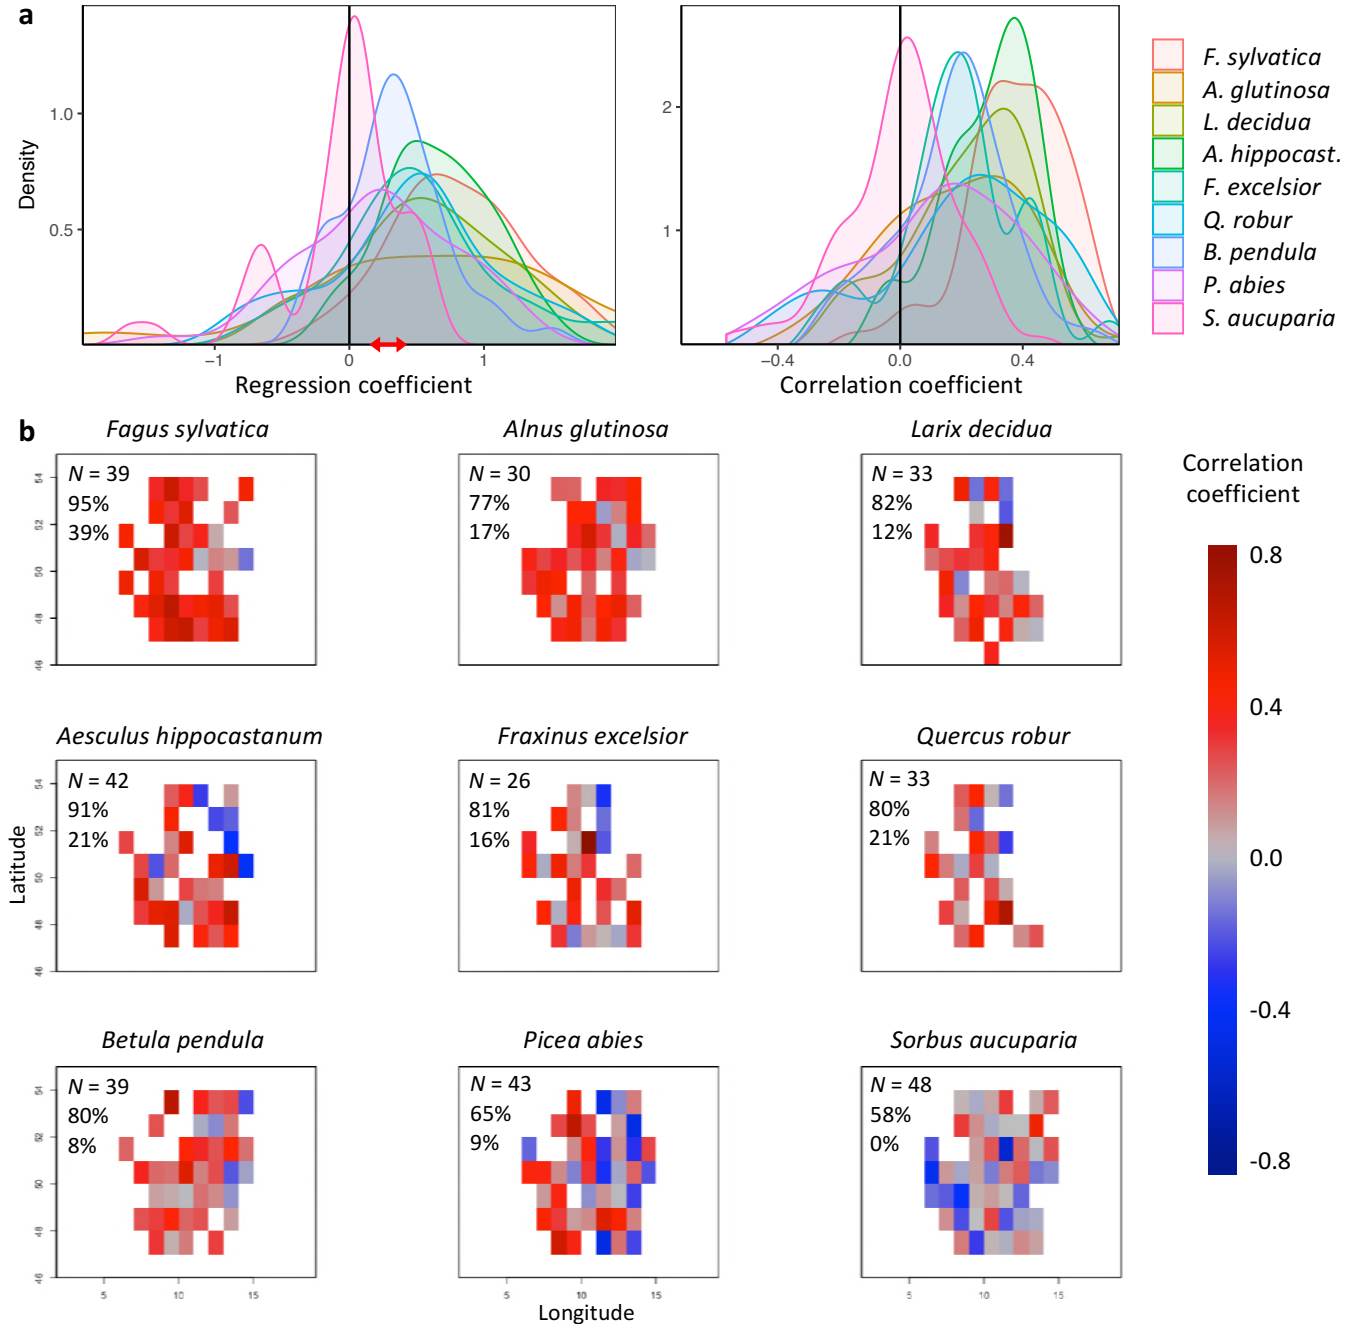

**Figure S1 | Effects of preseason temperature on inter-individual leaf-out synchrony (LOS), using PEP data.** **a**, Density plots of regression (left) and Pearson correlation coefficients (right) between LOS and preseason temperature for nine species. Regression coefficients show the change in LOS per each degree increase in preseason temperature. The red arrow indicates the range of regression coefficients obtained when simulating spring phenology with a degree-day model (see Extended Data Fig. 5). **b**, Maps showing the regression coefficients for the effect of temperature on LOS at each site (colour coding according to correlation coefficients).  $N$  = Number of sites ( $1^\circ \times 1^\circ$  pixels) in which the relationship was analysed. Percentages are the proportion of positive correlations and significantly positive correlations, respectively.

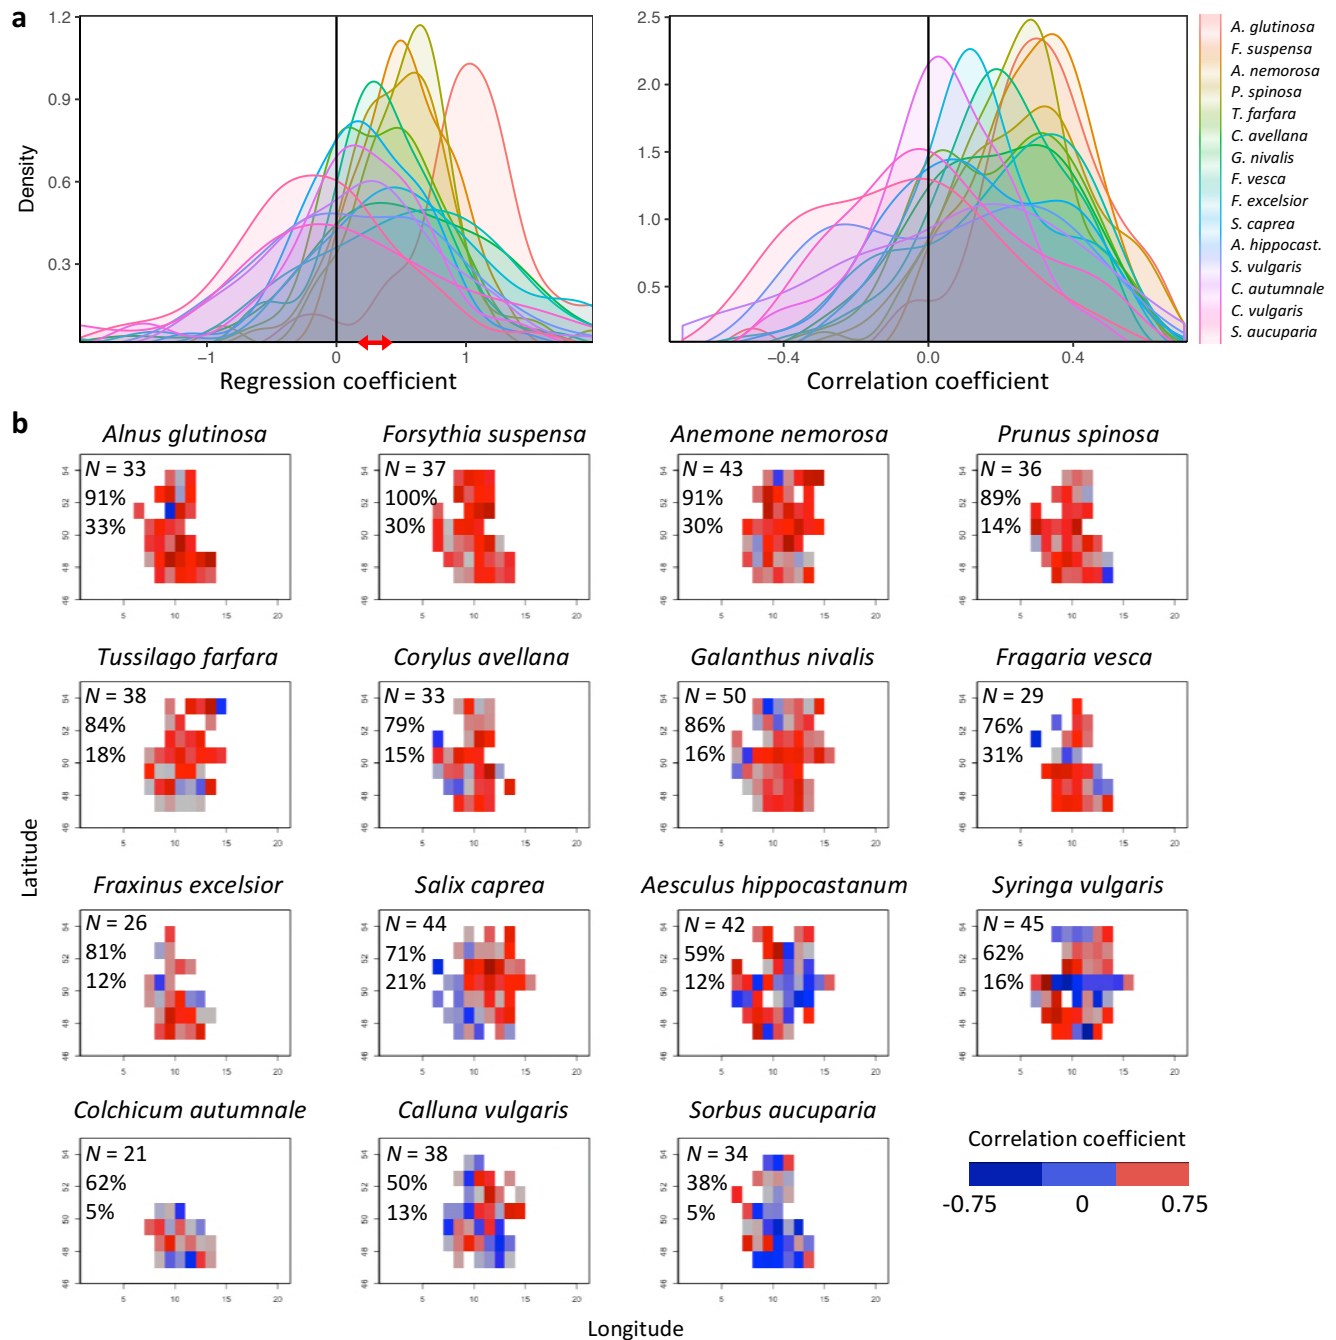

**Figure S2 | Effects of preseason temperature on inter-individual flowering synchrony (FLS), using PEP data. a**, Density plots of regression (left) and Pearson correlation coefficients (right) between FLS and spring temperature for 15 species. Regression coefficients show the change in FLS per each degree increase in spring temperature. The red arrow indicates the range of regression coefficients obtained when simulating spring phenology with a degree-day model (see Extended Data Fig. 5). **b**, Maps showing the correlation coefficients for the effect of temperature on FLS at each site (colour coding according to correlation coefficients). *N* = Number of sites (1° x 1° areas) in which the relationship was analysed. Percentages are the proportion of positive correlations and significantly positive correlations, respectively.

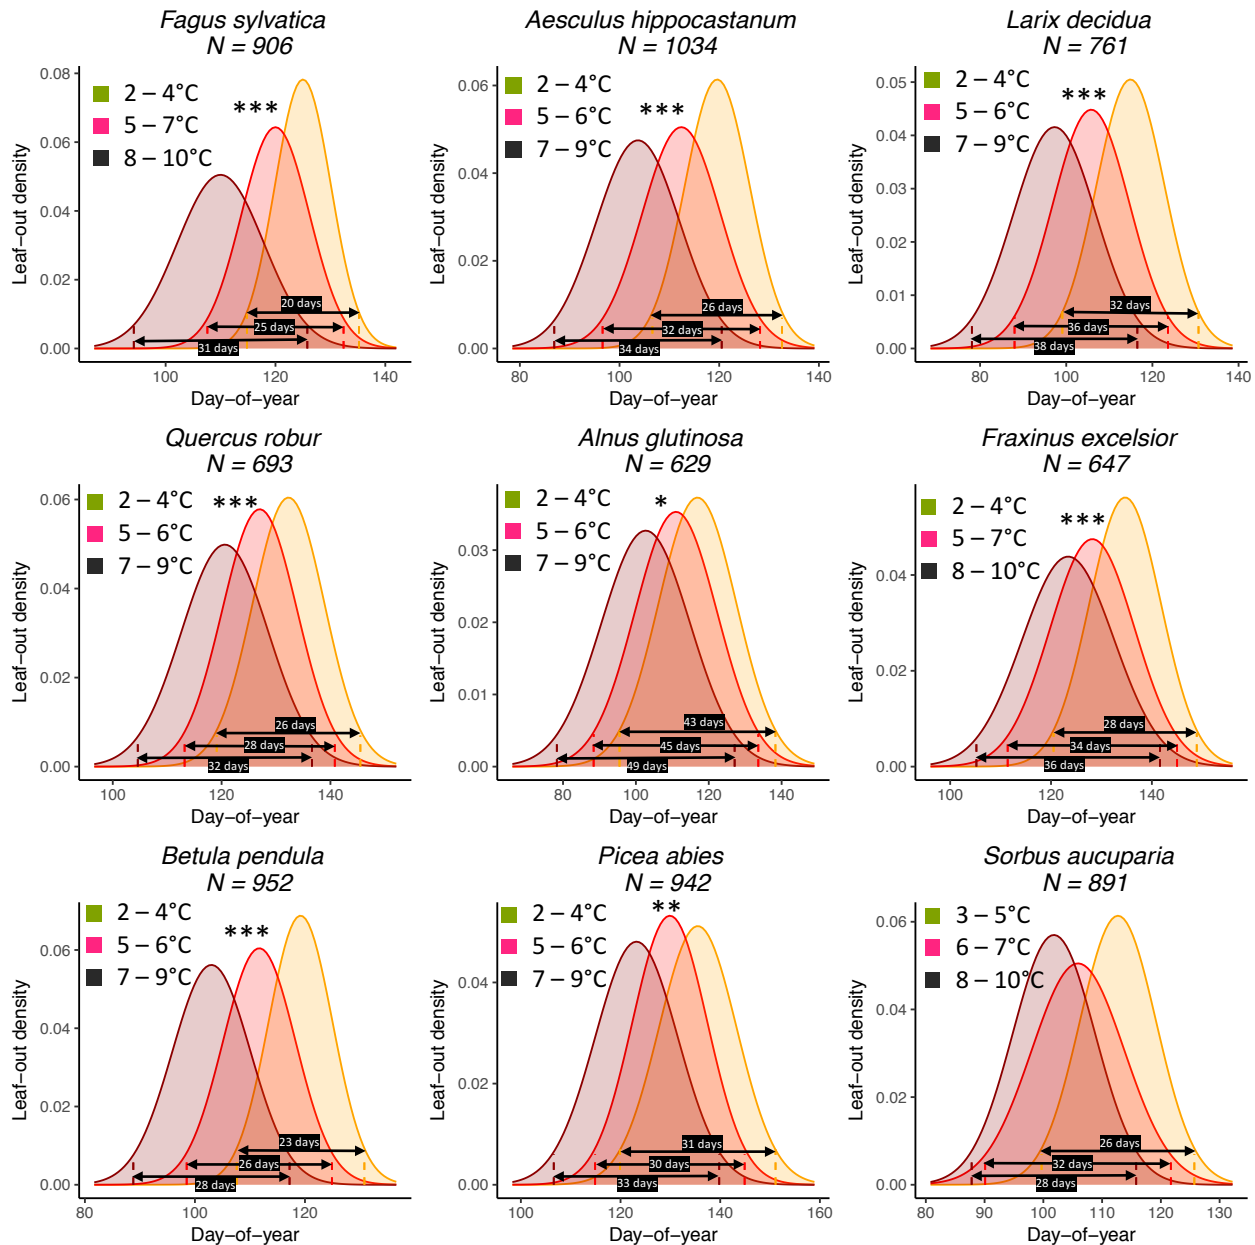

**Figure S3 | The effect of preseason temperature on inter-individual (within-population) leaf-out distributions.**  $N$  = Number of available year x site ( $1^\circ \times 1^\circ$  areas) combinations. To model the distributions (means and standard deviations), mixed-effects models were applied including site as a random effect. Stars indicate a significant positive effect of preseason temperature on LOS (\* $P < 0.05$ ; \*\* $P < 0.01$ ; \*\*\* $P < 0.001$ ). Black arrows show the period in which >95% of individuals leaf out (4 standard deviations), e.g., for *Fagus sylvatica*, in years with a cool preseason, 95% of individuals within a population leaf out within 20 days, whereas in years with a warm preseason this period is 31 days (55% longer).



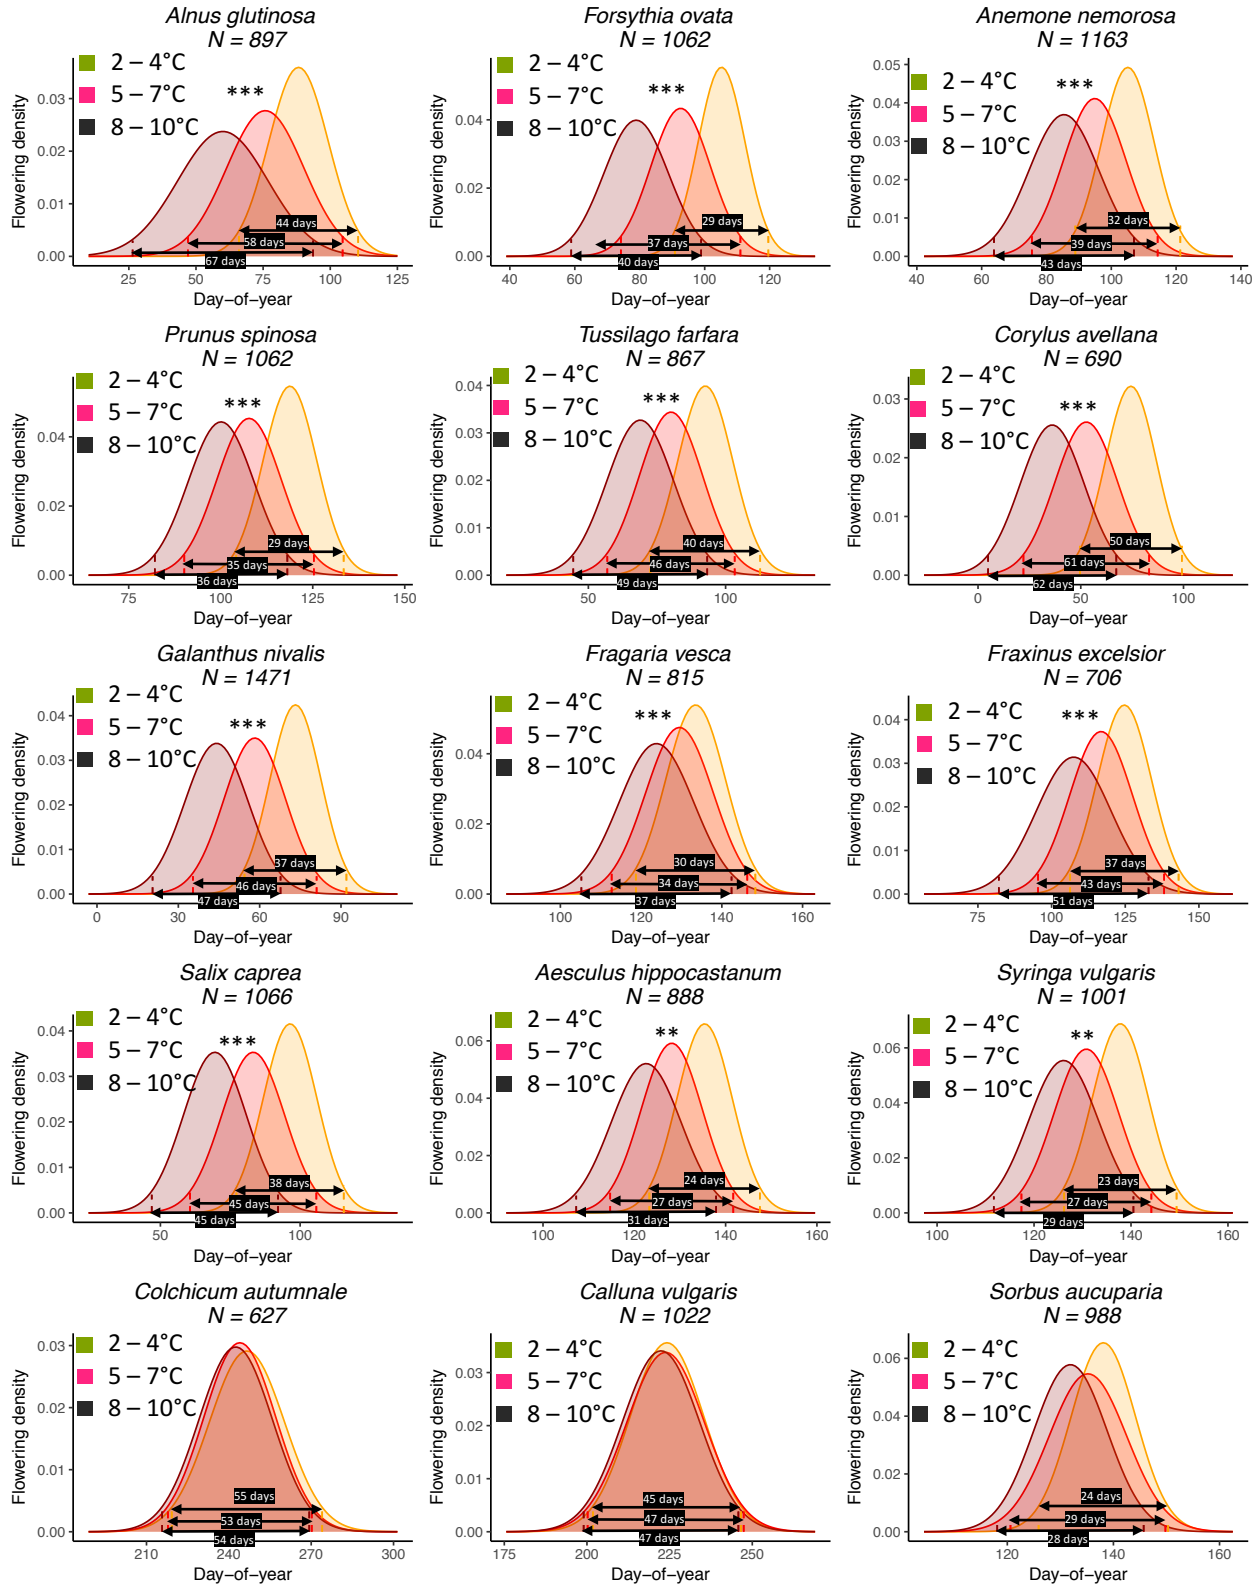

**Figure S4 | The effect of preseason temperature on inter-individual (within population) flowering distributions.**  $N$  = Number of available year x site ( $1^\circ \times 1^\circ$  areas) combinations. To model the distributions (means and standard deviations), mixed-effects models were applied including site as a random effect. Stars indicate a significant positive effect of preseason temperature on FLS ( $*P < 0.05$ ;  $**P < 0.01$ ;  $***P < 0.001$ ). Black arrows show the period in which >95% of individuals flower (4 standard deviations), e.g., for *Alnus glutinosa*, in years with a cool preseason, 95% of individuals within a population flower within 44 days, whereas in years with a warm preseason this period is 67 days (52% longer).

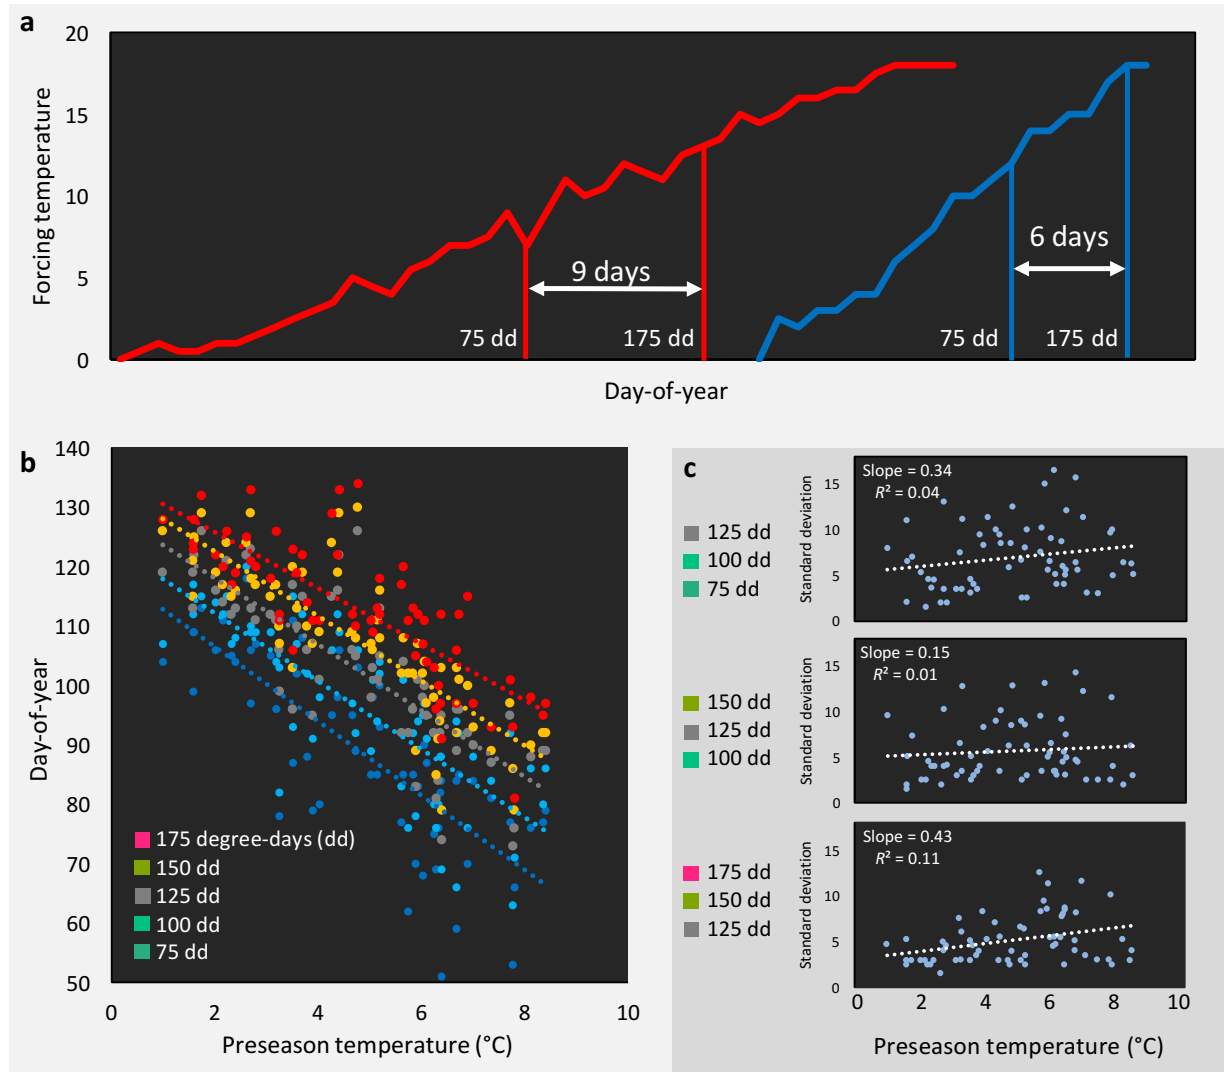

**Figure S5 | Does decreased LOS and FLS under climate warming result from a decrease in within-spring warming speed?** **a**, Schematic representation of the hypothesized relationship between climate warming and within-spring temperature increase (see refs. 14,15): in a cold year (blue line) temperature rises late but fast, in a warm year (red line) temperature rises early but more slowly (flattening the temperature curve during spring). The result would be a less synchronized phenology in warm years, because forcing sums required for the occurrence of the respective phenological event are more spread out. This is illustrated by the date (day-of-year) at which 75 or 175 degree-days (cumulative daily temperature above 5°C starting 1 of January) accumulate in both cases (difference of 9 day in the warm year vs. 6 days in the cold year). **b**, The day of year when 75, 100, 125, 150, or 175 degree-days have accumulated, shown as response to mean preseason temperature (14 Feb until 15 April) in the respective year, using temperature data for 63 years (1955–2017) from Munich, Germany. **c**, The standard deviations of the dates (days of year) when (i) 75, 100, and 125 degree-days have accumulated (upper panel), (ii) 100, 125, and 150 degree-days have accumulated (middle panel), and (iii) 125, 150, and 175 degree-days have accumulated (middle panel) in response to preseason temperature.

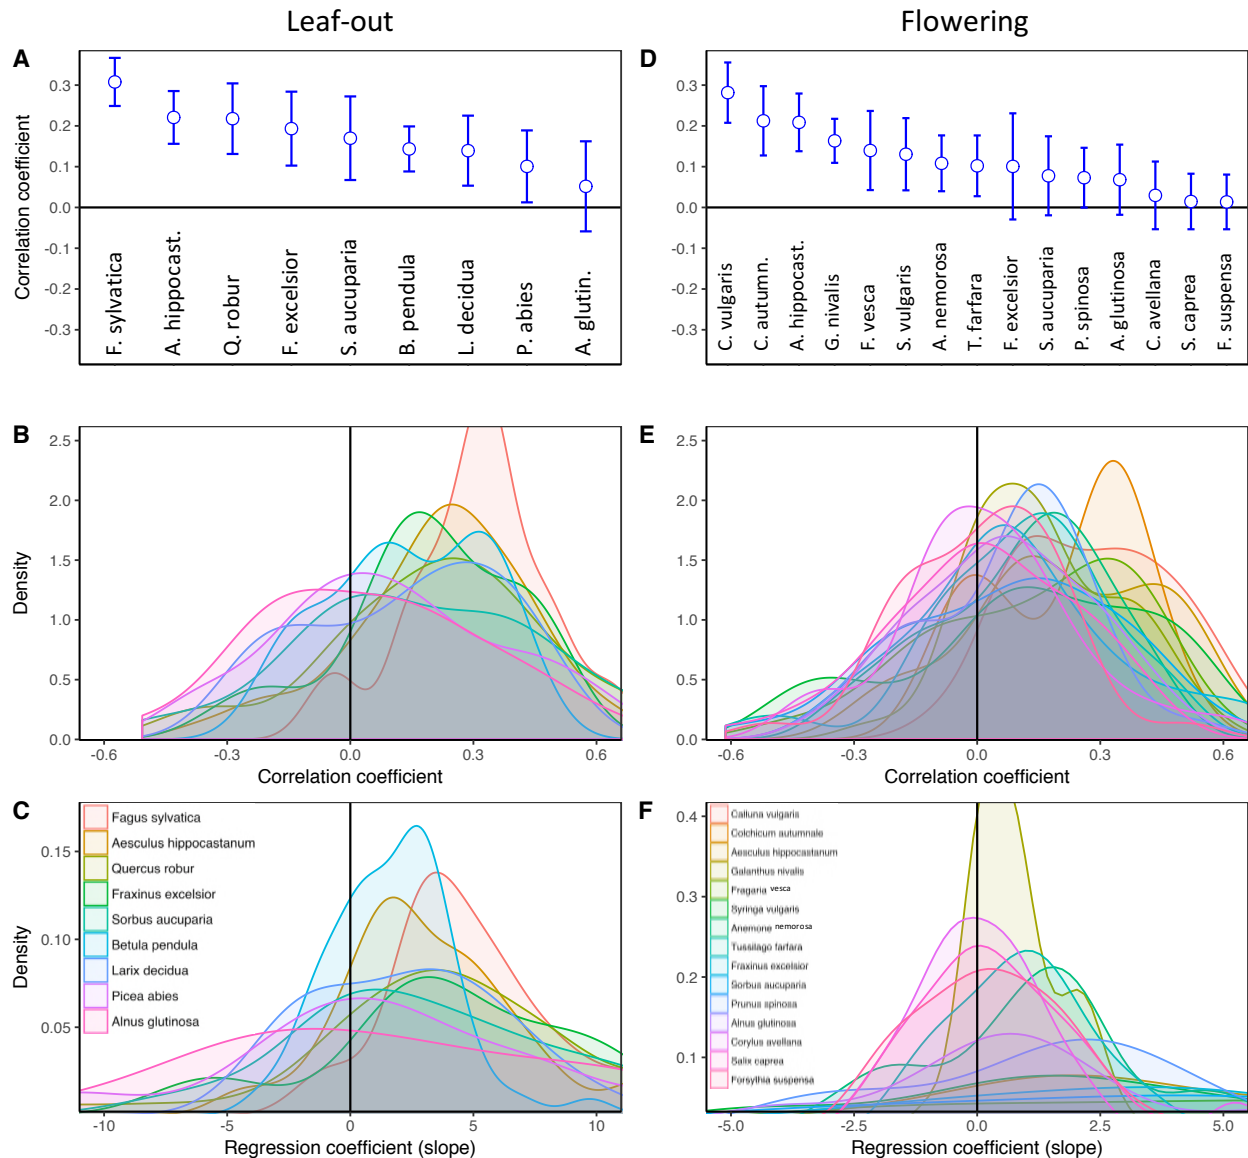

**Figure S6 | Greater variation of forcing requirements among individuals with increasing preseason temperatures.** Effects of preseason temperature on inter-individual LOS-DD (A–C) and FLS-DD (D–F), using PEP data. **A**, Mean Pearson correlation coefficients ( $\pm$  95% confidence intervals) for the effect of spring temperature on LOS-DD. See Figs. S1b and S2b for number of sites ( $1^\circ \times 1^\circ$  areas) in which the relationship was analysed. **B**, **C**, Density plots of regression (**B**) and Pearson correlation coefficients (**C**) between LOS-DD and spring temperature for nine species. Regression coefficients show the change in LOS-DD per each degree increase in spring temperature. **D–F**, Same plots for the effect of spring temperature on FLS-DD. LOS-DD = Standard deviation of inter-individual forcing requirements until leaf-out; FLS-DD = Standard deviation of inter-individual forcing requirements until flowering.

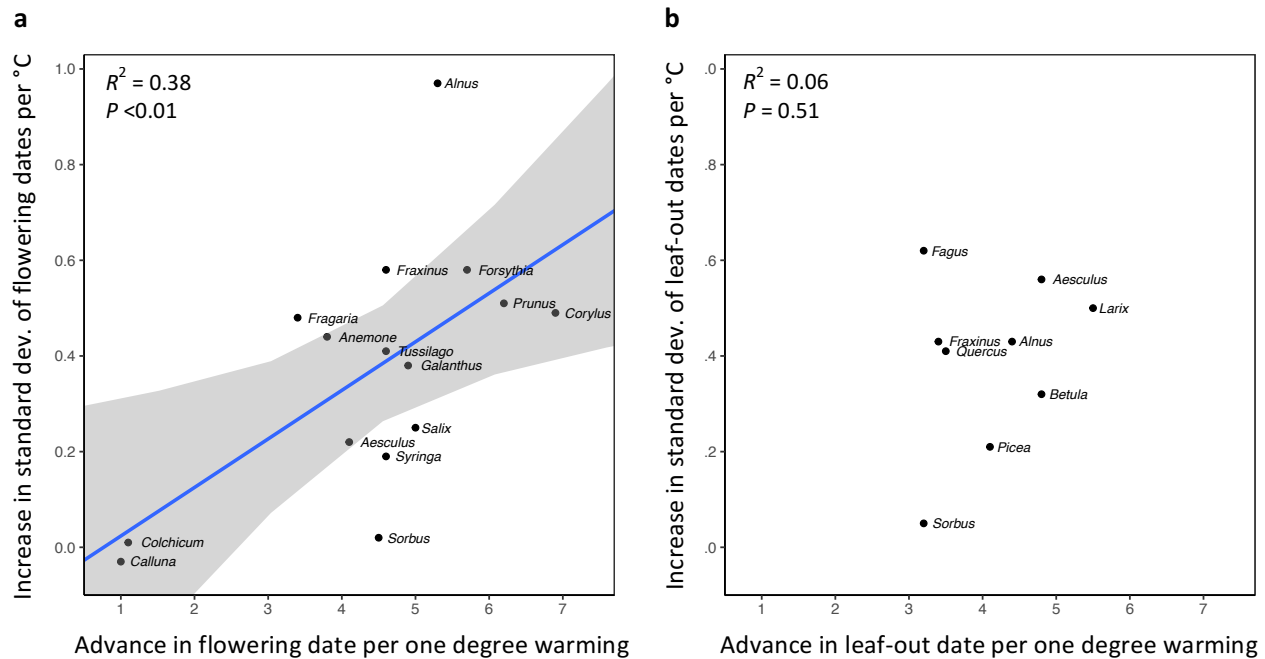

**Figure S7 | In species in which pre-season temperature has little effect on the mean flowering date, pre-season temperature also has little effect on FLS. a,** Positive correlation between species' mean temperature sensitivity of flowering date (days advance in flowering per one degree warming) and the mean temperature sensitivity of FLS (increase in the standard deviation of inter-individual flowering times per one degree warming). **b,** No correlation between species' mean temperature sensitivity of leaf-out date (days advance in leaf-out per one degree warming) and the mean temperature sensitivity of LOS (increase in the standard deviation of inter-individual leaf-out times per one degree warming). The effects of pre-season temperature on mean flowering date, mean leaf-out date, FLS, and LOS were inferred from mixed-effects models including site as a random effect. Species: *Alnus glutinosa*, *Aesculus hippocastanum*, *Anemone nemorosa*, *Betula pendula*, *Corylus avellana*, *Colchicum autumnale*, *Calluna vulgaris*, *Fraxinus excelsior*, *Forsythia suspense*, *Fagus sylvatica*, *Fragaria vesca*, *Galanthus nivalis*, *Larix decidua*, *Picea abies*, *Prunus spinosa*, *Quercus robur*, *Sorbus aucuparia*, *Salix caprea*, *Syringa vulgaris*, *Tussilago farfara*.

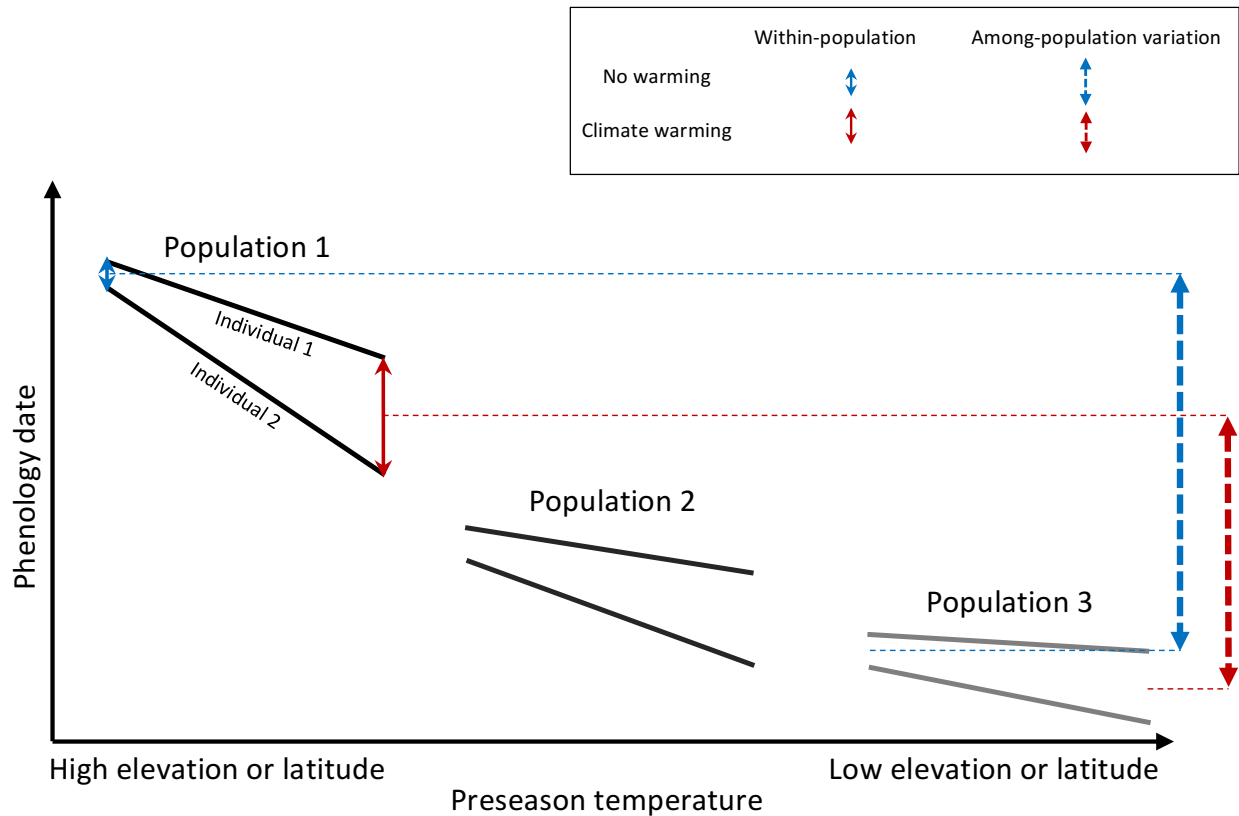

**Figure S8 | Schematic representation of within- and among-population phenological synchrony in response to climate warming.** As demonstrated in this study, inter-individual synchrony within a population will decrease under warmer pre-season temperatures because individuals differ in their sensitivity to temperature. Within-population variation under ambient or warmed pre-season temperatures is illustrated by the solid blue and red arrows, respectively. By contrast, phenological synchrony among populations is expected to increase, given that populations in warm regions (Population 3) will advance their phenology less than populations in cold regions (Population 1). This is illustrated by the dashed blue and red arrows, showing that the difference in the average phenological date between Population 1 and 3 is smaller under warmer pre-seasons (red dashed arrow) than under ambient pre-season temperatures (blue dashed arrow).

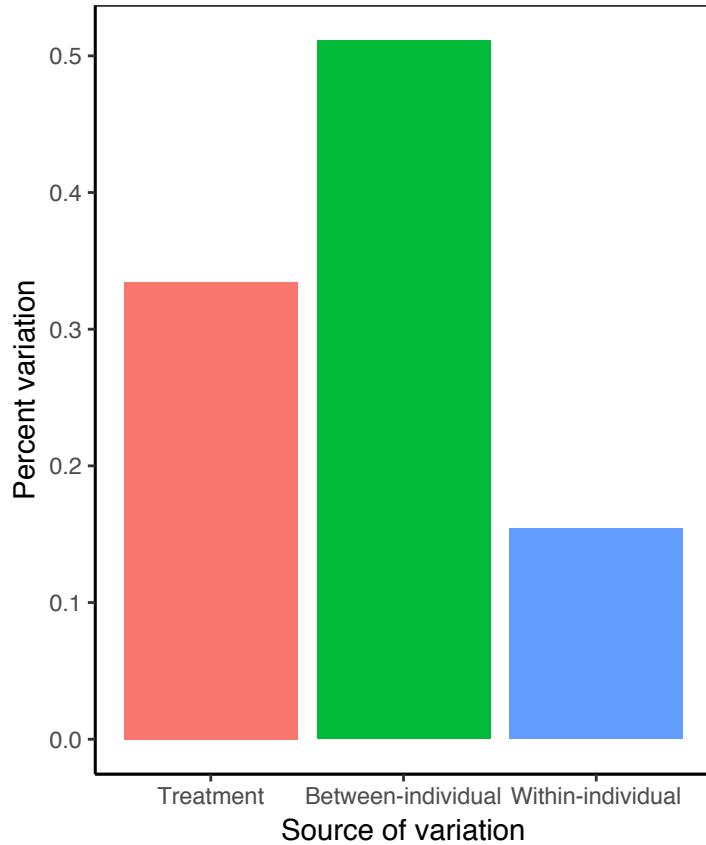

**Figure S9 | Percent variation in leaf-out dates attributable to treatment effects and between- and within-individual variation within treatments.** Data from experiment 2 (see Methods). Variance components were inferred from random-effects-only models, including leaf-out date as the dependent variable and treatment and individuals as nested random effects.
